# Supplementary material for: Immunomodulatory Effects of 1,25-Dihydroxyvitamin D3on Dendritic Cells Promote Induction of T Cell Hyporesponsiveness to Myelin-Derived Antigens
Source: Hindawi journal article supplement (doi:10.1155/2016/5392623), 2016-01-01
Supplement: f1 [file 5392623.f1.pdf]

## Supplementary Materials

Supplementary Figure 1

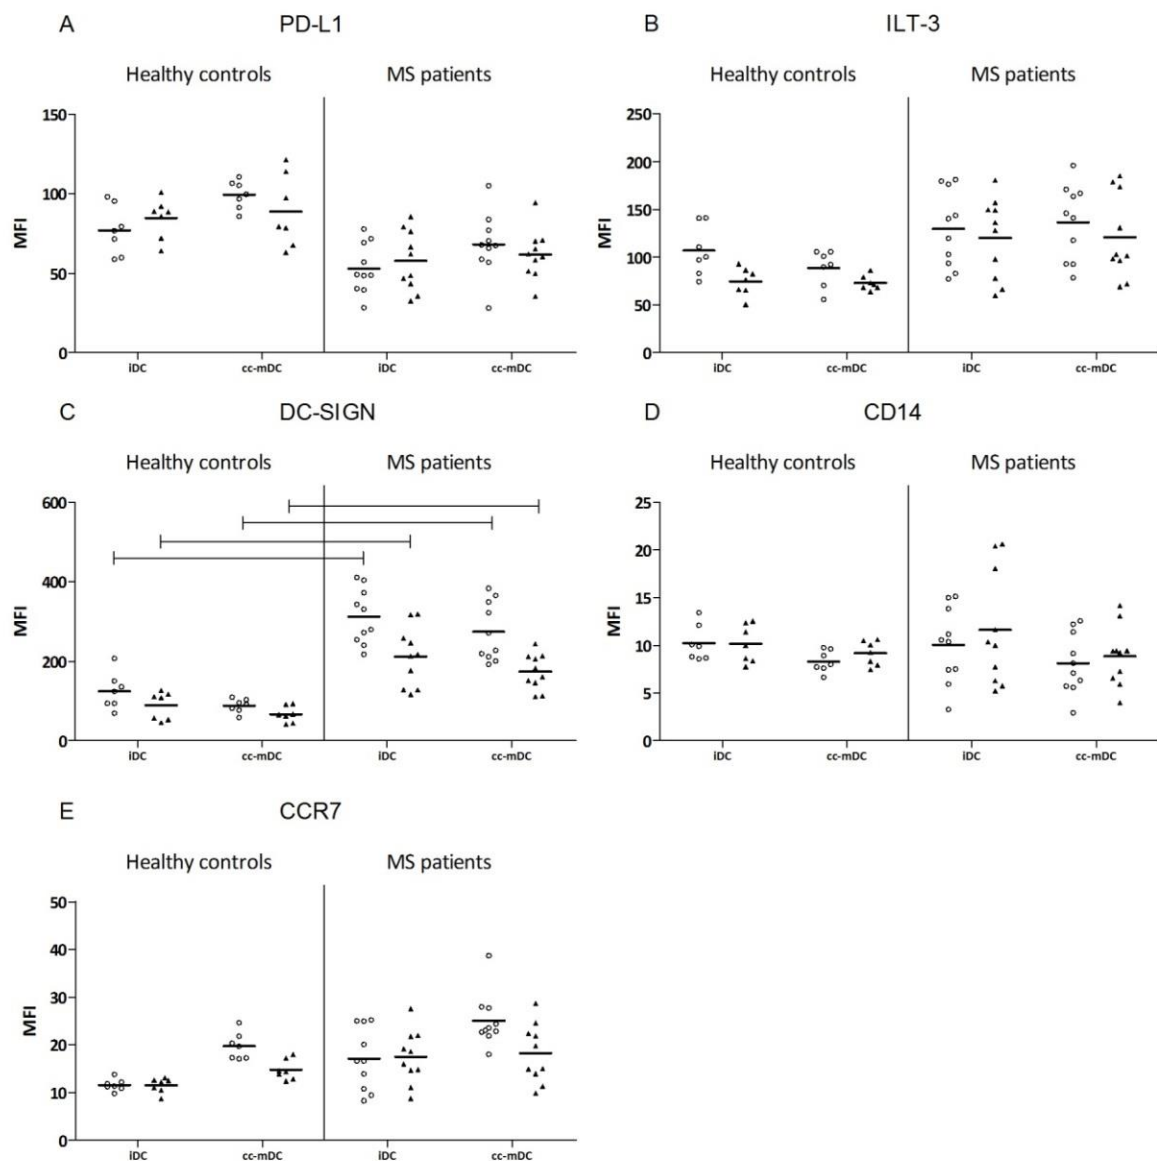

**Supplementary Figure 1: Phenotypic characteristics of *in vitro* differentiated iDC and cc-mDC from healthy controls and MS patients**

CD14<sup>+</sup> monocytes were cultured for 6 days in the presence of IL-4 and GM-CSF or in the presence of IL-4, GM-CSF and 1,25(OH)<sub>2</sub>D<sub>3</sub> to obtain conventional iDC (open dots) or 1,25(OH)<sub>2</sub>D<sub>3</sub>-treated iDC (filled triangles) respectively. On day 6, DC were stimulated with a cocktail of pro-inflammatory cytokines (i.e. cc-mDC) or left untreated (i.e. iDC). The mean fluorescence intensity (MFI) of (A) PD-L1, (B) ILT-3, (C) DC-SIGN, (D) CD14 and (E) CCR7 by DC of healthy controls (n=7) and MS patients (n=10) is determined by flow cytometry. Horizontal lines show the mean.

Abbreviations used: MFI, mean fluorescence intensity; iDC, immature DC; cc-mDC, cytokine cocktail-matured DC.
